# Supplementary material for: Cryo-EM of PMEL Amyloids Reveals Pathogenic Mechanism of Pigment Dispersion Syndrome.
Source: Research Square preprint supplement (doi:10.21203/rs.3.rs-5540188/v1), 2024-12-11
Supplement: Supplementary file 1 [file 793c2fb2ef1da650929ba72a.docx]

**Table 1 Summary of parameters**

| Data collection parameters |  |
| --- | --- |
| **Magnification** | 60,000 |
| **Pixel size (Å)** | 0.8784 |
| **Voltage (keV)** | 300 |
| **Defocus range (µm)** | 0.8-2.0 |
| **Exposure time (sec)** | 5.5 |
| **Number of frames per movie** | 50 |
| **Total dose (e-/Å2)** | 50 |

|  | **Native WT**  **Polymorph 1** | **Native WT**  **Polymorph 2** | **Native G175S** | ***In vitro* WT** | ***In vitro* G175S** |
| --- | --- | --- | --- | --- | --- |
| **Number of movies** | 16,081 | 16.081 | 7,280 | 4,331 | 5,020 |
| **Box size (pixels)** | 280 | 280 | 280 | 300 | 300 |
| **Number of particles** | 286,491 | 352,878 | 576,997 | 147,735 | 781,124 |
| **Initial model** | ModelAngelo | ModelAngelo | ModelAngelo | ModelAngelo | ModelAngelo |
| **Bonds lengths RSMD (Å)** | 0.090 | 0.089 | 0.090 | 0.089 | 0.088 |
| **Bonds angles RSMD (°)** | 1.882 | 1.876 | 1.884 | 1.880 | 1.985 |
| **MolProbability score** | 0.91 | 0.70 | 0.69 | 0.91 | 0.91 |
| **Clash score** | 0.00 | 0.00 | 0.00 | 0.00 | 0.00 |
| **Rotamer outliers (%)** | 0.00 | 0.00 | 0.00 | 0.00 | 0.00 |
| **Ramachandran plot (%)** | Favored: 93.94  Allowed: 6.06  Outliers: 0.00 | Favored: 96.77  Allowed: 3.23  Outliers: 0.00 | Favored: 96.88  Allowed: 3.12  Outliers: 0.00 | Favored: 93.94  Allowed: 6.06  Outliers: 0.00 | Favored: 93.75  Allowed: 6.25  Outliers: 0.00 |
| **CaBLAM outliers (%)** | 6.45 | 0.00 | 0.00 | 6.45 | 6.67 |
| **B-factors (min/max/mean)** | 18.17/55.61/30.58 | 63.33/100.00/98.61 | 80.76/100.00/98.81 | 18.17/55.61/30.58 | 80.76/100.0/98.81 |
| **Map resolution estimates (Å)** | 1.79 | 1.79 | 1.79 | 1.94 | 1.79 |
| **Helical Twist (°)** | 177.7 | -4.1 | 178.4 | 177.8 | 178.4 |
| **Helical Rise (Å)** | 2.34 | 4.67 | 2.35 | 2.31 | 2.38 |
| **EMDB accession numbers** | 61782 | 61783 | 61784 | 61785 | 61786 |
| **PDB accession codes** | 9JST | 9JSU | 9JSV | 9JSW | 9JSX |
